# Supplementary material for: Proline Dehydrogenase and Pyrroline 5 Carboxylate Dehydrogenase from Mycobacterium tuberculosis: Evidence for Substrate Channeling
Source: MDPI journal article supplement (doi:10.3390/pathogens12091171), 2023-09-18
Supplement: s1 [file s1]

## **Supplementary Materials**

### **Proline Dehydrogenase and Pyrroline 5 Carboxylate Dehydrogenase from *Mycobacterium tuberculosis*: Evidence for substrate channeling**

**Santosh Kumar<sup>1</sup>, Steven Segal<sup>1</sup>, Jamie K. Lynn-Barbe<sup>1</sup>, Dannika L.  
Harris<sup>1</sup>, Jordan T. Koehn<sup>2</sup>, Debbie C. Crans<sup>3</sup>, and Dean C. Crick<sup>1\*</sup>**

<sup>1</sup>Mycobacteria Research Laboratories, Department of Microbiology, Immunology  
and Pathology, 1682 Campus Delivery, Fort Collins, CO 80523, USA.

<sup>2</sup>Department of Chemistry, University of North Carolina, Chapel Hill NC 27599-  
3290, USA

<sup>3</sup>Chemistry Department, Colorado State University, Fort Collins, Colorado 80523,  
United States.

\*To whom correspondence should be addressed:

Mycobacteria Research Laboratories, Department of Microbiology, Immunology  
and Pathology, 1682 Campus Delivery, Fort Collins, CO 80523, USA.

E-mail: Dean.Crick@colostate.edu; Tel. (+1) 970 491 3308; Fax (+1) 970 491 1815

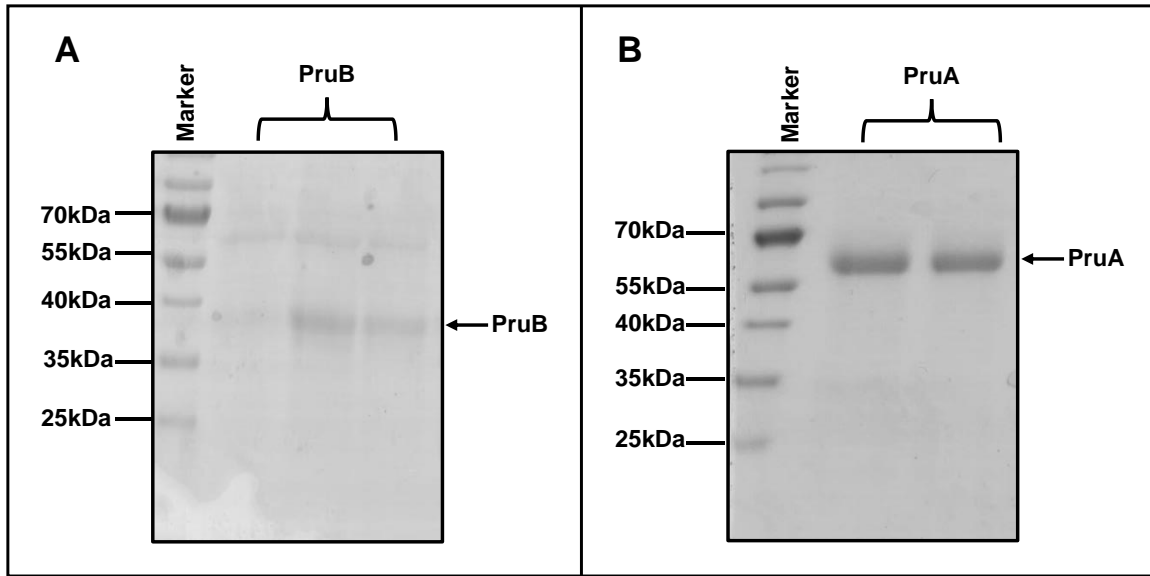

**Figure S1. Purification of PruB and PruA.** Representative 12%SDS-PAGE gels of 6His-PruB (Panel A) and 6His-PruA (Panel B) isolated from *M. smegmatis* after induction with 0.2% acetamide and purified on Ni-NTA affinity columns. Protein samples were electrophoresed on 12% polyacrylamide gels and stained with AcquaStain protein gel stain.

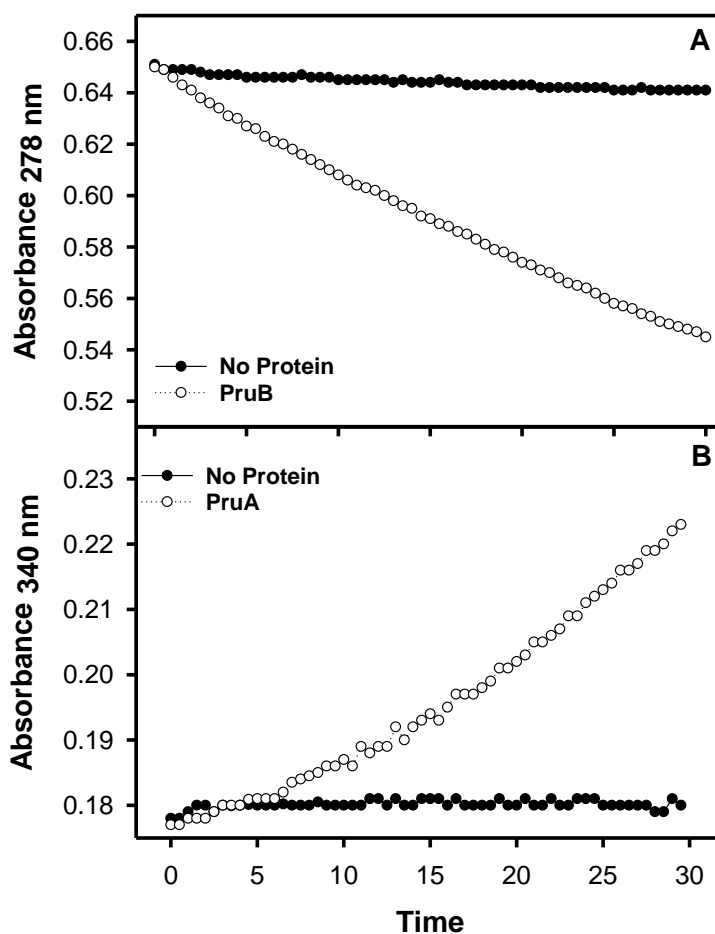

**Figure S2. Representative UV-Vis traces of enzyme activity.** For PruB (Panel A) enzyme activity was measured by monitoring decrease in absorbance at 278 nm. Assays contained 20mM Tris-HCl (pH 7.0), 25 ng of PruB, 20 mM L-proline, 100  $\mu$ M UQ-1, 5  $\mu$ M FAD in a 200  $\mu$ L reaction volume. The initial reaction rate was calculated between 2-5 min. For PruA (Panel B) enzyme activity was measured by monitoring the formation of NADH at 340 nm. The initial reaction rate was calculated between 3 and 7 min. Assays contained 500 ng of PruA, 0.3 mM P5C, 0.2 mM NAD<sup>+</sup> in 200  $\mu$ L of 20 mM Tris-HCl at pH 7.0. In both cases reactions were incubated at 25° C for 30 min.

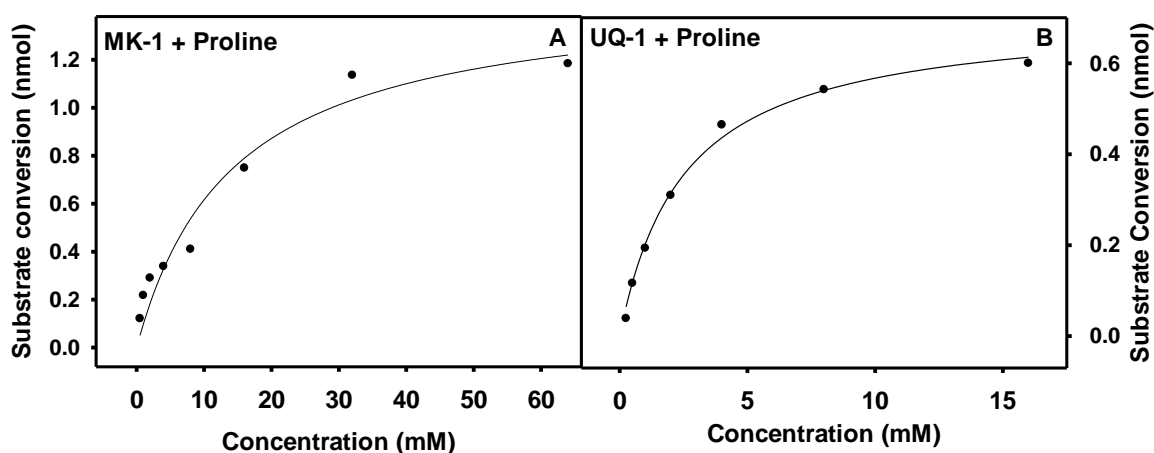

**Figure S3: Representative Michaelis-Menten curves for PruB** showing the effect of proline concentration in assays at saturating concentrations of MK-1 and varying concentrations of proline (Panel A) and the effect of proline concentration in assays at saturating concentrations of UQ-1 and varying concentrations of proline (Panel B). Assays contained 25 ng of PruB, in a final volume of 200  $\mu$ L in 20 mM Tris-HCl pH 7.0 and were incubated at 25°C for 30 min. Activities were monitored via decrease in absorbance at 270 nm in the case of MK-1 and 278 nm in the case of UQ-1. Calculated kinetic parameters can be found in Table 2.

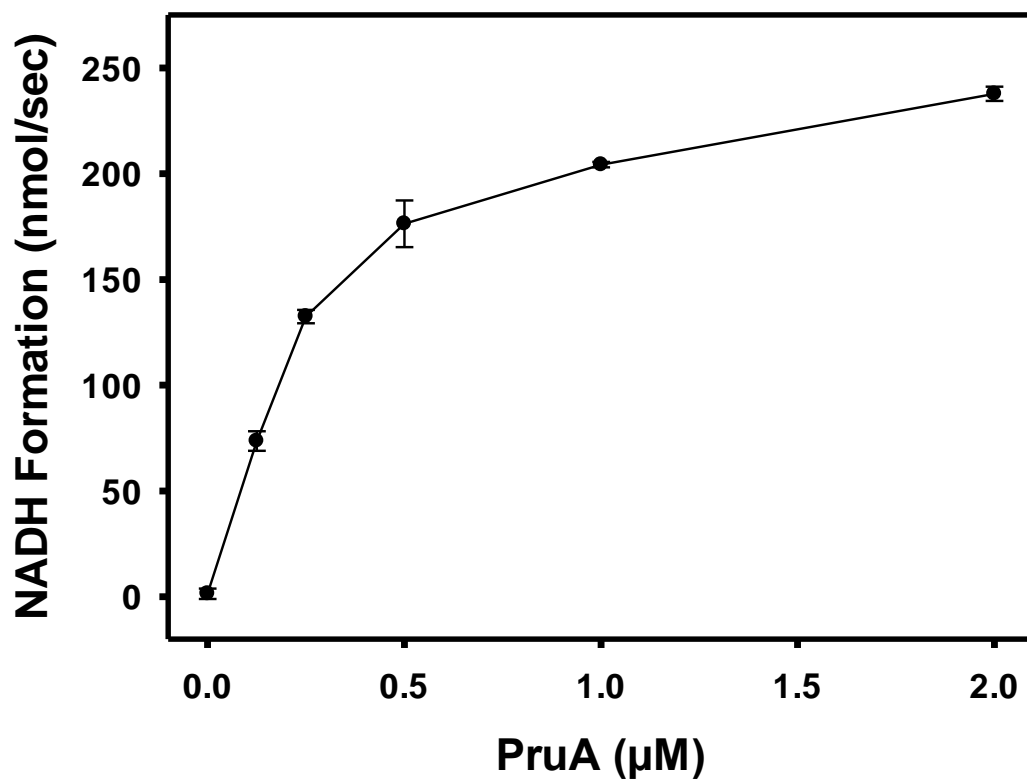

**Figure S4: PruB-PruA coupled reaction:** Reaction mixtures contained 20 mM Tris-HCl (pH 7.0), 5  $\mu\text{M}$  FAD, 100  $\mu\text{M}$  UQ-1, 200  $\mu\text{M}$   $\text{NAD}^+$ , 20 mM proline, and 0.5  $\mu\text{M}$  PruB. The reaction was initiated by the addition of the indicated amount of PruA enzyme for 30 min. NADH formation was monitored at 340 nm. Error bars indicate the standard deviation of the mean of three independent experiments.

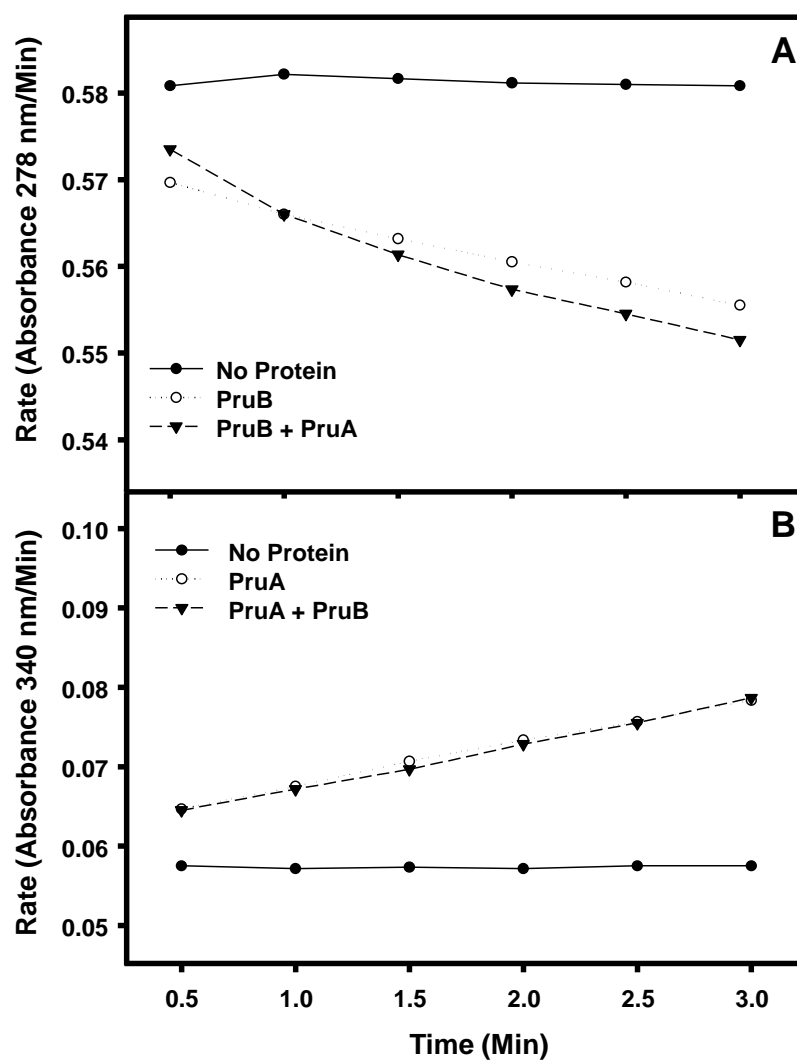

**Figure S5: PruB and PruA do not affect the reaction rate of the other enzyme:**  
Panel A - PruB activity was followed at 278 nm (UQ-1 reduction,). Assays

contained PruB (0.5  $\mu$ M), an equimolar mixture PruB and PruA (0.5  $\mu$ M each), or no protein, 20 mM proline, 5  $\mu$ M FAD and 100  $\mu$ M UQ-1 in 200  $\mu$ L of 20 mM Tris-HCl at 25°C. Panel B PruA activity was followed at 340 nm (NAD<sup>+</sup> reduction). Assays contained PruA (0.5  $\mu$ M), an equimolar mixture of mixture of PruA and PruB (0.5  $\mu$ M each) or no protein, 300  $\mu$ M DL-P5C and 200  $\mu$ M NAD<sup>+</sup> in 200  $\mu$ L of 20 mM Tris-HCl at 25°C

**Table S1. Primers used in the amplification of PruA and PruB constructs.**

| Primer<br>Restriction | sequences                                      | (5'---3') |
|-----------------------|------------------------------------------------|-----------|
| <b>Enzyme</b>         |                                                |           |
| PruA Forward          | 5- ATT cat atg GAC GCG ATC ACC CAG GTG CCG -3' |           |
| NdeI                  |                                                |           |
| PruA Reverse          | 5- TAT aag ctt TCA GTC GAC CGC CAT GTG CGG-3'  |           |
| HindIII               |                                                |           |
| PruB Forward          | 5- ATT cat atg GCC GGC TGG TTC GCG CAC-3'      |           |
| NdeI                  |                                                |           |
| PruB Reverse          | 5- TAT aag ctt TCA GCG CTC GGC GCA CCC-3'      |           |
| HindIII               |                                                |           |

**Table S2. Nonlinear fit of data shown in Figure 4 to a competitive inhibition model**

Competitive (Full)  
 Number of Replicates: 3

**Parameters**

|      | <u>Value</u> | <u>±Std. Error</u> | <u>95% Conf. Interval</u> |    |        |
|------|--------------|--------------------|---------------------------|----|--------|
| Vmax | 0.5970       | 1.053e-2           | 0.5761                    | to | 0.6179 |
| Km   | 0.2326       | 1.399e-2           | 0.2048                    | to | 0.2603 |
| Ki   | 6.6651       | 0.5033             | 5.6672                    | to | 7.6630 |

**Goodness of Fit**

|                    |          |
|--------------------|----------|
| Degrees of Freedom | 105      |
| AICc               | -805.730 |
| R <sup>2</sup>     | 0.978    |
| Sum of Squares     | 5.750e-2 |
| Sy.x               | 2.340e-2 |
| Runs Test p Value  | 0.221    |



**Data**

Number of x values        36  
Number of replicates       3  
Total number of values    108  
Number of missing values   0

**Enzyme Kinetics Data Summary**

Competitive (Full)

Number of Replicates: 3

| [Substrate] | [Inhibitor] | Velocity | ±Std.Err  | Predicted | Max Residual | Outliers |
|-------------|-------------|----------|-----------|-----------|--------------|----------|
| 0.05        | 0.00        | 0.0910   | 3.5000e-3 | 0.1056    | -2.1639e-2   |          |
| 0.10        | 0.00        | 0.2030   | 7.0000e-3 | 0.1795    | 3.0486e-2    |          |
| 0.20        | 0.00        | 0.2940   | 1.0500e-2 | 0.2760    | 2.8472e-2    |          |
| 0.40        | 0.00        | 0.3990   | 1.0500e-2 | 0.3775    | 3.1987e-2    |          |
| 0.80        | 0.00        | 0.4515   | 0.0210    | 0.4625    | -5.3041e-2   |          |
| 1.60        | 0.00        | 0.5005   | 3.5000e-3 | 0.5212    | -2.7742e-2   |          |
| 0.05        | 2.00        | 0.0665   | 7.0000e-3 | 8.4716e-2 | -3.2216e-2   |          |
| 0.10        | 2.00        | 0.1435   | 0.0140    | 0.1484    | -3.2878e-2   |          |
| 0.20        | 2.00        | 0.2450   | 2.4500e-2 | 0.2377    | 4.5817e-2    |          |
| 0.40        | 2.00        | 0.3395   | 9.2601e-3 | 0.3400    | 0.0170       |          |
| 0.80        | 2.00        | 0.4375   | 1.2619e-2 | 0.4333    | 2.8741e-2    |          |
| 1.60        | 2.00        | 0.5075   | 7.0000e-3 | 0.5021    | 1.2380e-2    |          |
| 0.05        | 4.00        | 0.0455   | 9.2601e-3 | 7.0711e-2 | -3.9211e-2   |          |
| 0.10        | 4.00        | 0.1330   | 3.5000e-3 | 0.1264    | 1.0054e-2    |          |
| 0.20        | 4.00        | 0.1855   | 3.5000e-3 | 0.2087    | -3.0191e-2   |          |
| 0.40        | 4.00        | 0.2940   | 3.3753e-2 | 0.3093    | -7.8273e-2   | 1        |
| 0.80        | 4.00        | 0.4305   | 0.0105    | 0.4075    | 3.3536e-2    |          |
| 1.60        | 4.00        | 0.4760   | 0.0305    | 0.4844    | -6.4352e-2   |          |
| 0.05        | 8.00        | 0.0455   | 3.5000e-3 | 5.3141e-2 | -1.1141e-2   |          |
| 0.10        | 8.00        | 0.0875   | 0.0140    | 9.7595e-2 | -2.4095e-2   |          |
| 0.20        | 8.00        | 0.1505   | 3.5000e-3 | 0.1678    | -2.0765e-2   |          |
| 0.40        | 8.00        | 0.2310   | 2.1000e-2 | 0.2619    | -5.1926e-2   |          |
| 0.80        | 8.00        | 0.3535   | 9.2601e-3 | 0.3641    | -2.8107e-2   |          |
| 1.60        | 8.00        | 0.4445   | 1.5256e-2 | 0.4523    | -3.2339e-2   |          |
| 0.05        | 16.00       | 0.0315   | 0.0000    | 0.0355    | -3.9994e-3   |          |
| 0.10        | 16.00       | 0.0665   | 3.5000e-3 | 6.7014e-2 | 6.4859e-3    |          |

|      |       |        |           |           |            |
|------|-------|--------|-----------|-----------|------------|
| 0.20 | 16.00 | 0.1260 | 1.2124e-2 | 0.1205    | 2.6498e-2  |
| 0.40 | 16.00 | 0.2100 | 6.0622e-3 | 0.2005    | 1.9972e-2  |
| 0.80 | 16.00 | 0.3185 | 9.2601e-3 | 0.3002    | 3.5783e-2  |
| 1.60 | 16.00 | 0.4130 | 7.0000e-3 | 0.3995    | 2.0475e-2  |
| 0.05 | 32.00 | 0.0210 | 0.0000    | 2.1334e-2 | -3.3438e-4 |
| 0.10 | 32.00 | 0.0455 | 3.5000e-3 | 4.1197e-2 | 1.1303e-2  |
| 0.20 | 32.00 | 0.0700 | 3.5000e-3 | 7.7075e-2 | -1.4075e-2 |
| 0.40 | 32.00 | 0.1365 | 6.0622e-3 | 0.1365    | -1.0524e-2 |
| 0.80 | 32.00 | 0.2170 | 9.2601e-3 | 0.2222    | -2.2728e-2 |
| 1.60 | 32.00 | 0.3535 | 7.0000e-3 | 0.3239    | 4.3608e-2  |

### Enzyme Kinetics Model Comparison

Study Type: Single Substrate - Single Inhibitor

Number of Replicates: 3

| Rank<br>by | Equation                                                          | R <sup>2</sup> | AICc     | Sy.x     | Run<br>Test | Convergence |
|------------|-------------------------------------------------------------------|----------------|----------|----------|-------------|-------------|
| 1          | $\frac{V_{max}}{[1+ (K_m/S) \times (1+I/K_i)]}$<br>(Competitive ) | 0.97794        | -805.730 | 2.340e-2 | Pass        | Yes         |
